# Supplementary material
Source: publisher figshare collection journal article supplement (https://frontiersin.figshare.com/ndownloader/files/14340320)
Supplement: Supplementary file [file 14340320]

Supplementary Table 2. Results of Dunnett’s multiple comparisons between target vs. other emotion intensities in scenarios.

| Emotion   | Results                    |
|-----------|----------------------------|
| Anger     | Anger > all others *       |
| Disgust   | Disgust > all others ***   |
| Fear      | Fear > all others *        |
| Happiness | Happiness > all others *** |
| Sadness   | Sadness > all others ***   |
| Surprise  | Surprise > all others ***  |

\*\*\*,  $p < 0.001$ ; \*,  $p < 0.05$ .
